# Supplementary material
Source: MDPI journal article supplement (https://www.mdpi.com/2076-0760/6/2/42)
Supplement: s1 [file s1]

**Supplement A – Typical interview questions.**

Note: These questions were used as a guide, but are not exhaustive of all questions asked, which varied based upon individual circumstances and participants’ responses.

*SA1. Typical interview questions for sex workers.*

- What is your name?
- How old are you?
- Where do you come from originally?
- Can you tell me a little bit about how you started doing this work, and for how long you have done it?
- Do you have children? How many?
- How have your experiences in sex work been up until now? What are the good parts, what are the bad parts?
- Have you ever had a bad experience? What did you do?
- If in a brothel: How is the treatment from the brothel owner?
- Have you always worked in this place [on the street/in brothels]?
  If so: Why?
  If not: How were your experiences in [other place], and how did it differ from your experiences here?
- What is your biggest challenge in this work?
- Have you ever seen anyone forced to do this work?
- How is your relationship with the police?
- How much do you normally charge?
- Does your family know that you do this?
- What do you think could be done to improve the conditions for sex workers?
- What, for you, would be the ideal legal model of sex work?
- What are your goals for the future?
- Is there anything else you would like to add?

*SA2. Typical interview questions for NGOs.*

- Can you tell me a little bit more about the work that you do with sex workers and what specific populations you work with?
- What are the general conditions of sex workers that you observe?
- What are the conditions like specifically for prostitutes in brothels?
- What do you see as the pros and cons for prostitutes of working in a brothel?
- Have you worked with prostitutes who had a good experience working in brothel? What about those who had a bad experience? What factors made it a good or bad experience?
- *For Argentina:* How well do you think the law against brothels is enforced? Why do you think that is? What implications does the enforcement/lack of enforcement of this law have on sex workers?
- Can you describe the relationship between sex workers and the police? What is your organization’s relationship with the police like?
- Do you think brothels should be legal or illegal? Why? How do the current laws regarding brothels impact sex workers?
- What do you think could be done to improve the conditions of sex workers in your country?
- Can you recommend anyone else I should talk to?

**Supplement B – Consent forms.**

*SB1. Consent form for personal interviews with sex workers.*

**Contacto:** Jessica Van Meir

**Correo electrónico:** [jev14@duke.edu](mailto:jev14@duke.edu)

**Teléfono:** +1 678-977-3540

Me llamo Jessica Van Meir, y soy una estudiante en Duke University en los Estados Unidos. Le pido a participar en un proyecto de investigación sobre las condiciones del trabajo sexual en América Latina. El objetivo de este proyecto es comparar las condiciones que enfrentan los/las trabajadores sexuales en diferentes países de América Latina y examinar los impactos que las leyes con respeto a los prostíbulos podrían tener sobre los/las trabajadores sexuales. El término “trabajador(a) sexual” se refiere a las personas que presten servicios sexuales por dinero o bienes, también frecuentemente llamado una prostituta, una persona prostituida, o una persona en situación de prostitución. Para esta investigación, uso este término no para tomar una posición en el debate sobre si la prostitución debe ser reconocida como trabajo legítimo o no, sino para tratar de reconocer la dignidad de las personas que ejercen la prostitución.

Su participación en el estudio es voluntaria. Si usted acepta participar, le haré algunas preguntas acerca de sus experiencias en el trabajo sexual y sus conocimientos sobre las condiciones que enfrentan los/las trabajadores sexuales en su país. Es posible que algunas de las preguntas serán sobre temas privados o que lo/la harán incómodo/a. Ud. está libre de no contestar cualquier pregunta; solamente hágame saber que prefiere pasar a la próxima pregunta. Para todas las preguntas, sus respuestas pueden ser tan largo o tan corto como desee. La entrevista tomará aproximadamente una hora, aunque puede ser más largo o más corto dependiendo de la longitud de sus respuestas. Puede optar por parar la entrevista en cualquier momento.

Me gustaría grabar la entrevista para que pueda tomar notas precisas acerca de nuestra conversación. Borraré las cintas tan pronto como las transcribo en notas. Por favor hágame saber si Ud. está cómodo/a con la grabación de la entrevista o si prefiere no ser grabado/a.

No usaré su nombre real en mi trabajo de investigación final o en cualquier presentación de mis conclusiones, en vez refiriéndome a usted por un seudónimo y omitiendo cualquier información de identificación para proteger su privacidad. Sin embargo, si prefiere que use su nombre real, por favor hágamelo saber. Si elige no ser identificado/a en el estudio, borraré los archivos que contienen su información de contacto cuando termino de hacer entrevistas para proteger su privacidad.

Por favor, hágame saber si usted tiene alguna pregunta antes de comenzar.

Puede ponerse en contacto conmigo en cualquier momento si usted tiene preguntas adicionales. Si desea hablar con alguien además de mí acerca de la investigación, puede ponerse en contacto con mi tutora, la Dra. Judith Kelley, en judith.kelley@duke.edu o al +1 919-613-7343. Todas las investigaciones con voluntarios humanos son revisadas por un comité que trabaja para proteger sus derechos y bienestar. Si tiene alguna pregunta o preocupación sobre sus derechos como entrevistado/a, puede comunicarse con la Oficina de la Junta de Revisión Institucional de Duke University, anónimamente si quiere, al +1 919-684-3030 o [ors-info@duke.edu](mailto:ors-info@duke.edu).

*SB2. Consent form for other interviews.*

**Contacto:** Jessica Van Meir

**Correo electrónico:** [jev14@duke.edu](mailto:jev14@duke.edu)

**Teléfono:** +1 678-977-3540

Me llamo Jessica Van Meir, y soy una estudiante en Duke University. Le pido a participar en un proyecto de investigación sobre las condiciones del trabajo sexual en América Latina. El objetivo de este proyecto es comparar las condiciones que enfrentan los/las trabajadores sexuales en diferentes países de América Latina y examinar los impactos que las leyes con respeto a los prostíbulos podrían tener sobre los/las trabajadores sexuales. El término “trabajador(a) sexual” se refiere a las personas que presten servicios sexuales por dinero o bienes, también frecuentemente llamado una prostituta, una persona prostituida, o una persona en situación de prostitución. Para esta investigación, uso este término no para tomar una posición en el debate sobre si la prostitución debe ser reconocida como trabajo legítimo o no, sino para tratar de reconocer la dignidad de las personas que ejercen la prostitución.

Su participación en el estudio es voluntaria. Si usted acepta participar, le haré algunas preguntas acerca de sus observaciones y conocimiento de las condiciones de los/las trabajadores sexuales basado en su trabajo. La entrevista tomará aproximadamente una hora, aunque puede ser más largo o más corto dependiendo de la longitud de sus respuestas.

Si está de acuerdo, me gustaría grabar la entrevista para que pueda tomar notas precisas acerca de nuestra conversación. Borraré las cintas tan pronto como las transcribo en notas. Sin embargo, Ud. está libre elegir no grabar la entrevista.

Me gustaría utilizar su nombre y atribuir las citas a usted en mi trabajo de investigación final. Sin embargo, si usted no se siente cómodo/a con la utilización de su nombre, puede solicitar permanecer anónimo/a. Incluso si se siente cómodo/a con la utilización de su nombre, por favor no dude en decirme si hay algo que le gustaría decir anónimamente. Si elige no ser identificado/a en el estudio, borraré los archivos que contienen su información de contacto cuando termino de hacer entrevistas para proteger su privacidad.

Si hay preguntas que prefiere no contestar, hágamelo saber y pasaremos a la siguiente pregunta. Para todas las preguntas, sus respuestas pueden ser tan largo o tan corto como desee. También puede optar por parar la entrevista en cualquier momento.

Por favor, hágame saber si usted tiene alguna pregunta antes de comenzar.

Puede ponerse en contacto conmigo en cualquier momento si usted tiene preguntas adicionales. Si desea hablar con alguien además de mí acerca de la investigación, puede ponerse en contacto con mi tutora, la Dra. Judith Kelley, en judith.kelley@duke.edu o al +1 919-613-7343, o si tiene alguna pregunta sobre sus derechos como entrevistado/a, puede comunicarse con la Oficina de la Junta de Revisión Institucional de Duke University al +1 919-684-3030 o [ors-info@duke.edu](mailto:ors-info@duke.edu).

Si acepta participar en la investigación, por favor firme abajo. Se le dará una copia del formulario para sus registros.

Firma del/de la Participante de la Investigación: ___________________ Fecha:___________

Nombre escrito del/de la Participante: ______________________________________

**Supplement C**

*SC1. Recruiting flyer for sex workers in Buenos Aires.*

Hola, me llamo Jessica Van Meir, y soy una estudiante en Duke University en los Estados Unidos. Estoy realizando una investigación comparando las condiciones del trabajo sexual en diferentes países de América Latina, y busco trabajadoras/es sexuales que estarían dispuestas/os de hacer una entrevista conmigo sobre sus experiencias y conocimientos. La entrevista puede ser completamente confidencial.

Si Ud. quiere participar, o si conoce a alguien que estaría dispuesta/o de participar, por favor ponle en contacto conmigo. ¡Gracias!

**Correo:** [jev14@duke.edu](mailto:jev14@duke.edu) **WhatsApp:** +1 678-977-3540 **Teléfono:** 11 5960-8441
